# Supplementary material
Source: publisher site journal article supplement (http://www.degruyter.com/publication/journal_key/REVIC/downloadAsset/REVIC_Instructions%20for%20Authors--en.pdf)
Supplement: Supplementary file 1 [file REVIC_Instructions%20for%20Authors--en.pdf]

## Reviews in Inorganic Chemistry – Instructions for Authors

### Editorial policy

*Reviews in Inorganic Chemistry (Rev Inorg Chem)* is a peer-reviewed journal that publishes critical scientific as well as technical reviews. Manuscripts are independently reviewed by peers selected by the Editors. Decisions are reached as quickly as possible. *Rev Inorg Chem* aspires to notify authors about the editorial decision within 3-4 weeks from the submission date. When manuscripts are accepted subject to revision, the revised manuscript should be returned within approx. 2 months. Accepted papers are promptly published online ahead-of-print as soon as they have been finally processed.

**Unpublished material:** Submission of a manuscript to *Rev Inorg Chem* implies that the work described is not copyrighted, published or submitted elsewhere, except in abstract form. The corresponding author should ensure that all authors approve the manuscript before its submission to *Rev Inorg Chem*.

**Ethical conduct of research:** The authors must describe and confirm safeguards to meet ethical standards.

**Conflict of interest:** When authors submit a manuscript, they are responsible for recognizing and disclosing financial and/or other conflicts of interest that might bias their work and/or could inappropriately influence his/her judgment. If no specified acknowledgement is given, the Publishers assume that no conflicts of interest exist.

**Copyright:** Manuscripts are accepted on condition of transfer of copyright (for U.S. government employees: to the extent transferable) to *Rev Inorg Chem*. Once the manuscript is accepted, it may not be published elsewhere without the consent of the copyright holders.

### Manuscript submission

Manuscripts must be submitted online at the following URL:

<http://mc.manuscriptcentral.com/revic>.

For online submission it is mandatory to suggest possible reviewers for the peer reviewing process. Please indicate the names and address details (including e-mail address) of at least four potential referees who are not from the Editorial Board of the journal.

### Preparation of manuscripts

#### Language

Manuscripts should be written in clear and concise English. Authors who are not fully fluent in idiomatic English should have the text proofread by an English native speaker before submission. At the proof stage, only minor changes other than corrections of printers' errors are allowed.

#### General format and length

Manuscripts (including table legends, figure legends and references) should be typed double-spaced with font size 12 letters; use Times Roman or Arial font and Symbol for Greek characters. Pages should be numbered (with the title page as 1) and have margins of 2.5 cm (1 inch) on all sides. Footnotes in the text should be avoided in favor of parentheses. Review articles may occupy between 10 and 60 printed pages. Each full page of printed text corresponds to approximately 1000 words (ca. 2.5 manuscript pages with pt 12 letters, 1.5 line spacing).

**Nomenclature:** Authors should consult the *The ACS Style Guide*, 3<sup>rd</sup> Edition, American Chemical Society, Washington, DC, 2006, for nomenclature and format guidelines. Chemical names, abbreviations and acronyms should be given in parentheses at the first appearance in the text. Well-known procedures/reactions should be designated by name, and appropriate literature references should be given.

Manuscripts should be organized into Title page, Abstract (up to 200 words), Keywords (up to 6), main body of text with headings/subheadings as appropriate (the first section being invariably the "Introduction"), Acknowledgments, References list, Table(s), Figures and separate Figure legends (if applicable).

#### References

Within the text references should be cited by author and date. For the formatting of the References list please refer to *The ACS Style Guide*, 3<sup>rd</sup> Edition, American Chemical Society, Washington, DC, 2006. The general format is Last Name, First Initial.; Last Name, First Initial. Title. *Journal*. Year, Volume, Pages. Journal abbreviations should be those used in the *Chemical Abstracts Service Source Index (CASS) 1907-2004 Cumulative* and its supplements.

#### •Articles in journals:

Shatruk, M.; Chambers, K.E.; Prosvirin, A.V.; Dunbar, K.R. Systematic investigation of trigonal-bipyramidal cyanide-bridged clusters of the first row transition metals. *Inorg. Chem.* **2007**, *46*, 5155-5165.

#### •Articles published online ahead of print:

Abou-Hassan, A.; Sandre, O.; Cabuil, V. Microfluidics in inorganic chemistry. *Angew. Chem. Int. Ed.* **2010**, published ahead of print; DOI: 10.1002/anie.200904285.

#### •Books and Monographs:

Cotton, F.A.; Murillo, C.A.; Bochmann M. *Advanced Inorganic Chemistry*, 6<sup>th</sup> Edition; Wiley: Hoboken, NJ, 1999.

#### •Chapters:

Steph, B. A.; George, K. F. Antifreezes and Deicing Fluids. In *Kirk-Othmer Encyclopedia of Chemical Technology*; 4<sup>th</sup> Edition. Howe-Grant, M., Ed. Wiley-Interscience: New York, 1992; Vol. 3, pp 347-367.

### Tables

Submit tables on separate pages and number them consecutively using Arabic numerals. Provide a short descriptive title, column headings, and (if necessary) footnotes to make each table self-explanatory. Refer to tables in the text as Table 1, 2, etc. Use Table 1, etc. in the table legends. In setting up tables, please consider the type area of *Rev Inorg Chem* (17×23.5 cm) and the column width (8.2 cm).

### Figures

**General requirements:** All illustrations must be of reproduction-ready quality. They will be reduced in size to fit, whenever possible, the width of a single column. Lettering of all figures within the article should be uniform in style (preferably a sans serif typeface like Helvetica) and of sufficient size (ca. 8 pt.). Uppercase letters A, B, C, etc. should be used to identify parts of multi-part figures. Cite all figures in the text in numerical order. Do not embed figures within the text body of the manuscript.

**Halftone figures (grayscale and color)** should have a minimum resolution of 300 dpi and be of good contrast. Authors are encouraged to submit illustrations in color if necessary for conveying their scientific content. Publication of color figures is provided free of charge both in online and print editions.

**Line drawings** must be of reproduction-ready quality. Please note that faint shading may be lost upon reproduction. When drawing bar graphs, use patterning instead of grey scales. Lettering of all figures should be uniform in style. A resolution of 1200 dpi is recommended.

**Chemical structures** should be produced with a drawing program, preferably ChemDraw. The current versions of ChemDraw have the appropriate parameters incorporated ("ACS Documents 1996").

**Figure legends:** Provide a short descriptive title and a legend to make each figure self-explanatory on separate pages. Explain all symbols used in the figures. Remember to use the same abbreviations as in the text body.

**Permissions:** It is the authors' responsibility to obtain permission to reproduce original or modified material that has been previously published.

**Author photo and short CV:** Authors may submit a portrait photograph and a short scientific CV (4-6 sentences, written in 3<sup>rd</sup> person singular) of all authors of a manuscript. Please use the appropriate "file designation" terms for the CV text file(s) and author photograph(s) during online submission. This information will be published in the article after the References section.

**Offprints:** The electronic files of typeset articles in Adobe Acrobat PDF format are provided free of charge; corresponding authors receive notification that their article has been published online. Paper offprints can be ordered in addition; an offprint order form will accompany the page proofs and should be completed and returned with the corrected proofs immediately.

**Note for authors of NIH-funded research:** De Gruyter acknowledges that the author of an US-agency-funded article retains the right to provide a copy of the final manuscript to agency upon acceptance for publication or thereafter, for public archiving in PubMed Central 12 months after publication in *Rev Inorg Chem*. Note that only the accepted author's version of the manuscript, not the PDF file of the published article, may be used for NIH archiving.

#### Please contact the Editorial Office with any further questions:

Editorial Office Reviews in Inorganic Chemistry  
de Gruyter  
Genthiner Str. 13  
D-10785 Berlin, Germany  
Tel. 0049-30-26005176; Fax 0049-30-26005298  
e-mail: rev.inorg.chem.editorial@degruyter.com
